# Prognostic potential of neutrophil-to-lymphocyte ratio for appendicular skeletal muscle mass reduction in males aged 70 and older

Ying-Jen Chen<sup>1,2,5</sup>, Chieh-Li Yen<sup>1,2,5</sup>, Chern-Horng Lee<sup>1,2,5</sup>, Kuo-Chen Liao<sup>1,2,5</sup>, Ji-Tseng Fang<sup>3,5</sup>, Tz-Shiu Tsai<sup>1,2</sup>, Yi-Ching Chen<sup>2</sup>, Chun-Yen Lin<sup>4,5</sup>

<sup>1</sup>Geriatric Medical Center, Linkou Medical Center, Chang Gung Memorial Hospital, Taoyuan, Taiwan

<sup>2</sup>Department of Geriatrics and General Internal Medicine, Linkou Medical Center, Chang Gung Memorial Hospital, Taoyuan, Taiwan

<sup>3</sup>Department of Nephrology, Linkou Medical Center, Chang Gung Memorial Hospital, Taoyuan, Taiwan

<sup>4</sup>Division of Hepatology, Department of Gastroenterology and Hepatology, Linkou Medical Center, Chang Gung Memorial Hospital, Taoyuan, Taiwan

<sup>5</sup>College of Medicine, Chang Gung University, Taoyuan, Taiwan

**Correspondence to:** Chun-Yen Lin; **email:** [chunyenlin@gmail.com](mailto:chunyenlin@gmail.com), <https://orcid.org/0000-0003-3007-3190>

**Keywords:** sarcopenia, skeletal muscle, inflammatory index, neutrophil-to-lymphocyte ratio, NLR

**Received:** April 22, 2024

**Accepted:** January 10, 2025

**Published:** March 6, 2025

**Copyright:** © 2025 Chen et al. This is an open access article distributed under the terms of the [Creative Commons Attribution License](https://creativecommons.org/licenses/by/4.0/) (CC BY 4.0), which permits unrestricted use, distribution, and reproduction in any medium, provided the original author and source are credited.

## ABSTRACT

Inflammation plays a pivotal role in the age-related decline of skeletal muscle mass, leading to sarcopenia in the elderly. The prevalence of sarcopenia notably increases among males aged  $\geq 70$ . However, it remains unclear whether inflammatory indexes are associated with the reduction in skeletal muscle mass in the elderly population.

Thirty-one males aged  $\geq 70$ , without severe diseases or dementia, were enrolled in the study. They underwent muscle mass measurements, physical measurements, and hematological tests at the onset of the study and after a one-year follow-up.

Twenty-eight participants were successfully followed for one year. Appendicular skeletal muscle mass index (ASMI) decreased by  $3.30 \pm 2.41\%$  in 14 participants and increased by  $2.66 \pm 1.61\%$  in the other 14 participants compared to baseline levels. The baseline neutrophil-to-lymphocyte ratio (NLR) was  $2.14 \pm 0.56$  in the ASMI-decreased group and  $1.66 \pm 0.62$  in the ASMI-increased group. A statistically significant negative correlation was found between baseline NLR and the change in ASMI in linear regression analyses. The area under the curve (AUC) of the baseline NLR for predicting ASMI decline was 0.724, with an optimal sensitivity of 64.3% and specificity of 78.6% at a cut-off value of 1.94.

NLR emerged as a potential prognostic marker for ASMI reduction in elderly males. However, further studies are necessary to assess its clinical utility.

## INTRODUCTION

Loss of skeletal muscle mass, strength, and/or function leads to sarcopenia, which has been associated with fall-related injuries [1], decreased quality of life [2], and poor outcomes in various diseases, including

coronavirus disease 2019 (COVID-19) [3], coronary artery disease [4], non-small-cell lung cancer [5, 6], and renal cell carcinoma [7]. Cao and colleagues estimated the prevalence of sarcopenia to be 1.5% among men aged 60-69, increasing notably to 9.6% among men aged 70-79 and 33.1% among those aged

80 and older [8]. Therefore, monitoring skeletal muscle mass, strength, and function is essential for the elderly. However, current methods for assessing muscle mass, such as dual-energy x-ray absorptiometry (DXA) or bioelectrical impedance analysis (BIA) [9], are challenging to implement regularly on a large scale. Common screening tools for sarcopenia include the Strength, Assistance with walking, Rise from a chair, Climb stairs, and Falls (SARC-F) questionnaire and calf circumference (CC) measurement. These tools primarily focus on the physical outcomes of sarcopenia, and their effectiveness in screening for the loss of skeletal muscle mass remains unclear. Therefore, a more convenient approach for large-scale muscle mass assessment may be necessary.

Inflammation plays a crucial role in the reduction of skeletal muscle mass [10], contributing to sarcopenia in the elderly [11]. Inflammatory indexes such as the neutrophil-to-lymphocyte ratio (NLR), platelet-to-lymphocyte ratio (PLR), and systemic immune-inflammation index (SII) have been associated with sarcopenia risk [12–16]. Additionally, studies have shown that neutrophils, platelets, and lymphocytes are involved in skeletal muscle atrophy, regeneration, and repair [17–19]. These inflammatory indexes, derived from absolute counts of peripheral blood cells, suggest the potential for monitoring sarcopenia risk during routine hematological tests. However, the correlation between these inflammatory indexes and the loss of skeletal muscle mass remains unclear.

Reduced skeletal muscle mass is often underestimated among the elderly, as it is weakly linked to declined physical performance [20]. To intervene and prolong skeletal muscle health in the elderly as early as possible, this study aimed to identify markers for evaluating skeletal muscle mass reduction. Specifically, we aimed to elucidate the potential of inflammatory indexes for screening the elderly with reduced skeletal muscle mass for further examination.

## RESULTS

### Baseline characteristics of participants with increased and decreased ASMI

Out of the 31 participants enrolled in this study, 28 were successfully followed for one year and completed all tests (Figure 1). It was observed that ASMI increased by  $2.66 \pm 1.61\%$  in 14 participants over the year, while it decreased by  $3.30 \pm 2.41\%$  in the other 14 participants. The prevalence of sarcopenia was 57.14% among participants with increased ASMI and 28.57% among those with

decreased ASMI. However, the prevalence of sarcopenia was not significantly associated with ASMI change ( $p$ -value = 0.127). To identify potential prognostic markers of ASMI reduction, the baseline physical measurements and hematological test results of participants with increased and decreased ASMI were retrospectively compared. Correlation coefficients between the baseline levels of each characteristic and ASMI change were analyzed (Table 1). Significantly negative correlations between ASMI change and BMI, CC, neutrophil proportion in WBC, and NLR were noted, and a positive correlation between ASMI change and lymphocyte proportion in WBC was observed. The characteristics mentioned above exhibited apparent differences between the baseline levels of participants with increased and decreased ASMI.

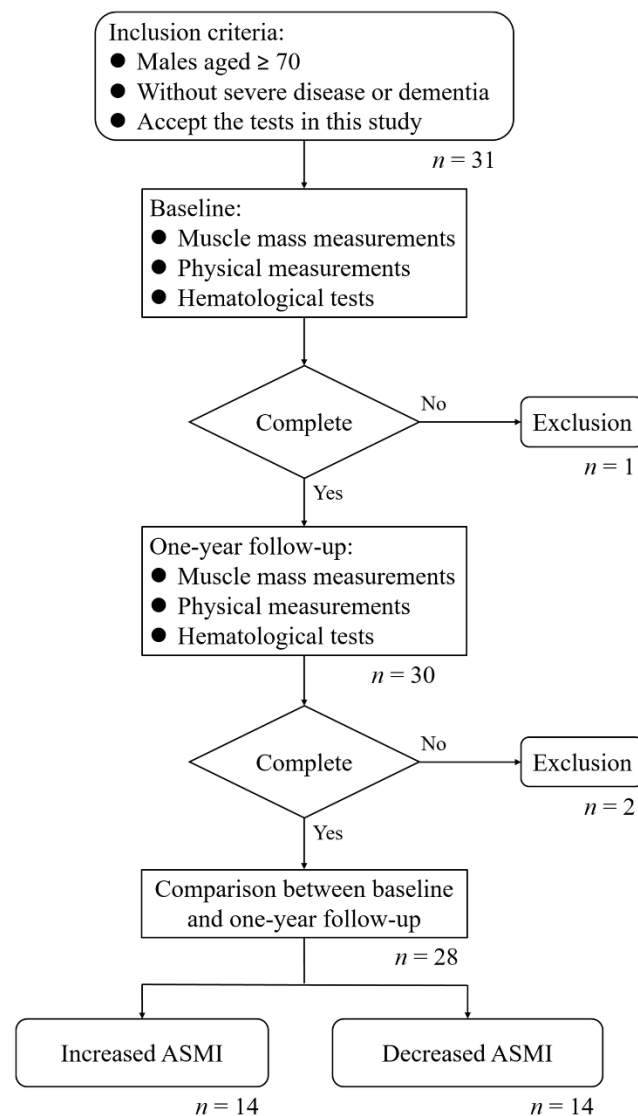

Figure 1. Flowchart of this study.

**Table 1. Relationships between baseline characteristics and ASMI changes.**

| Characteristics                | Increased ASMI<br>(n = 14) | Decreased ASMI<br>(n = 14) | p-value <sup>a</sup> | Correlation with<br>ASMI change |              |
|--------------------------------|----------------------------|----------------------------|----------------------|---------------------------------|--------------|
|                                |                            |                            |                      | r                               | p-value      |
| Sarcopenia, n (%)              |                            |                            | 0.127                |                                 |              |
| Yes                            | 8 (57.14)                  | 4 (28.57)                  |                      |                                 |              |
| No                             | 6 (42.86)                  | 10 (71.43)                 |                      |                                 |              |
| ASMI change, %                 | 2.66 ± 1.61                | -3.30 ± 2.41               |                      |                                 |              |
| Age, years                     | 76.21 ± 2.46               | 76.43 ± 6.54               | 0.910                | -0.036                          | 0.857        |
| Height, cm                     | 164.73 ± 5.97              | 165.63 ± 6.79              | 0.713                | -0.175                          | 0.372        |
| BMI, kg/m <sup>2</sup>         | <b>25.18 ± 2.18</b>        | <b>28.48 ± 4.73</b>        | <b>0.029</b>         | <b>-0.478</b>                   | <b>0.010</b> |
| CC, cm                         | <b>34.92 ± 2.12</b>        | <b>37.15 ± 3.05</b>        | <b>0.041</b>         | <b>-0.493</b>                   | <b>0.010</b> |
| WBC, 10 <sup>9</sup> /L        | 6.63 ± 2.12                | 6.36 ± 1.67                | 0.717                | 0.064                           | 0.748        |
| Neutrophil, 10 <sup>9</sup> /L | 3.68 ± 1.50                | 3.83 ± 1.02                | 0.760                | -0.090                          | 0.649        |
| Neutrophil/WBC, %              | <b>54.16 ± 9.02</b>        | <b>60.24 ± 5.73</b>        | <b>0.043</b>         | <b>-0.413</b>                   | <b>0.029</b> |
| Monocyte, 10 <sup>9</sup> /L   | 0.42 ± 0.16                | 0.44 ± 0.12                | 0.727                | 0.112                           | 0.571        |
| Monocyte/WBC, %                | 6.27 ± 1.31                | 7.02 ± 1.44                | 0.162                | 0.020                           | 0.921        |
| Lymphocyte, 10 <sup>9</sup> /L | 2.26 ± 0.62                | 1.90 ± 0.73                | 0.168                | 0.270                           | 0.165        |
| Lymphocyte/WBC, %              | <b>35.54 ± 8.68</b>        | <b>29.34 ± 5.34</b>        | <b>0.031</b>         | <b>0.380</b>                    | <b>0.046</b> |
| Platelet, 10 <sup>9</sup> /L   | 217.21 ± 71.63             | 192.43 ± 48.81             | 0.295                | 0.308                           | 0.111        |
| NLR                            | <b>1.66 ± 0.62</b>         | <b>2.14 ± 0.56</b>         | <b>0.038</b>         | <b>-0.428</b>                   | <b>0.023</b> |
| MLR                            | <b>0.18 ± 0.05</b>         | <b>0.25 ± 0.06</b>         | <b>0.007</b>         | -0.279                          | 0.150        |
| PLR                            | 101.48 ± 38.46             | 114.98 ± 56.83             | 1.000                | -0.045                          | 0.819        |
| SII                            | 348.07 ± 153.56            | 403.49 ± 128.54            | 0.310                | -0.081                          | 0.682        |
| SIRI                           | 0.71 ± 0.39                | 0.92 ± 0.31                | 0.121                | -0.192                          | 0.328        |
| PIV                            | 151.83 ± 104.86            | 178.29 ± 85.98             | 0.472                | 0.018                           | 0.928        |

Characteristics, excluding sarcopenia prevalence, were presented as mean ± S.D. Statistical significance was denoted by bold values.

<sup>a</sup>Comparison between numbers or levels in study participants with increased and decreased ASMI.

### One-year follow-up of participants with increased and decreased ASMI

Changes in physical and hematological characteristics from baseline to one-year follow-up were analyzed in participants with increased and decreased ASMI, and their correlation coefficients with ASMI change were evaluated (Table 2). A significantly positive correlation was revealed between changes in BMI and ASMI, and a negative correlation was revealed between changes in systemic inflammation response index (SIRI) and ASMI. However, only the decline of BMI from baseline to one-year follow-up in participants with decreased ASMI was a significant change.

### Potential factor for predicting one-year ASMI reduction

The baseline levels of NLR, BMI and CC were subjected to univariable regression analyses for ASMI change, with all variables showing significantly

negative association. These baseline variables were then included in multivariable regression analyses, where baseline NLR exhibited the strongest negative association with ASMI change among all baseline variables (Table 3).

The baseline NLR was further analyzed using ROC curve analyses to evaluate its relationship with ASMI change. The area under the curve (AUC) for baseline NLR was 0.724 (*p*-value = 0.043) (Figure 2A). The optimal sensitivity (64.3%) and specificity (78.6%) for predicting ASMI decline were observed when the cut-off was set at 1.94 (Figure 2B).

## DISCUSSION

Chronic systemic inflammation is a key aging-related phenotypes [21]. Aging-related inflammatory cytokines have been shown to contribute to the loss of skeletal muscle mass. For instance, tumor necrosis factor- $\alpha$  (TNF- $\alpha$ ) activates the signaling pathway of muscle cell

**Table 2. Relationships between changes in characteristics from baseline to one-year follow-up and ASMI changes.**

| Characteristics                | ASMI <sup>a</sup> | One-year follow-up  | <i>p</i> -value <sup>b</sup> | Change from baseline | Correlation with ASMI change |                 |
|--------------------------------|-------------------|---------------------|------------------------------|----------------------|------------------------------|-----------------|
|                                |                   |                     |                              |                      | <i>r</i>                     | <i>p</i> -value |
| BMI, kg/m <sup>2</sup>         | +                 | 25.29 ± 1.99        | 0.608                        | 0.11 ± 0.76          | <b>0.489</b>                 | <b>0.008</b>    |
|                                | -                 | <b>27.91 ± 4.68</b> | <b>0.010</b>                 | -0.57 ± 0.71         |                              |                 |
| CC, cm                         | +                 | 34.75 ± 1.94        | 0.786                        | -0.19 ± 1.79         | 0.319                        | 0.112           |
|                                | -                 | 36.14 ± 2.60        | 0.228                        | -0.69 ± 1.96         |                              |                 |
| WBC, 10 <sup>9</sup> /L        | +                 | 6.34 ± 2.07         | 0.194                        | -0.29 ± 0.80         | -0.352                       | 0.066           |
|                                | -                 | 6.69 ± 1.97         | 0.433                        | 0.32 ± 1.49          |                              |                 |
| Neutrophil, 10 <sup>9</sup> /L | +                 | 3.53 ± 1.56         | 0.511                        | -0.15 ± 0.84         | -0.342                       | 0.075           |
|                                | -                 | 4.12 ± 1.66         | 0.460                        | 0.29 ± 1.44          |                              |                 |
| Neutrophil/WBC, %              | +                 | 53.70 ± 12.00       | 0.828                        | -0.46 ± 7.83         | -0.140                       | 0.479           |
|                                | -                 | 60.81 ± 9.99        | 0.811                        | 0.57 ± 8.72          |                              |                 |
| Monocyte, 10 <sup>9</sup> /L   | +                 | 0.41 ± 0.17         | 0.631                        | -0.01 ± 0.08         | -0.266                       | 0.172           |
|                                | -                 | 0.46 ± 0.13         | 0.415                        | 0.02 ± 0.10          |                              |                 |
| Monocyte/WBC, %                | +                 | 6.36 ± 1.13         | 0.742                        | 0.09 ± 0.95          | 0.036                        | 0.855           |
|                                | -                 | 6.91 ± 1.27         | 0.761                        | -0.11 ± 1.38         |                              |                 |
| Lymphocyte, 10 <sup>9</sup> /L | +                 | 2.14 ± 0.63         | 0.249                        | -0.13 ± 0.40         | 0.014                        | 0.945           |
|                                | -                 | 1.86 ± 0.66         | 0.761                        | -0.04 ± 0.44         |                              |                 |
| Lymphocyte/WBC, %              | +                 | 35.87 ± 12.37       | 0.863                        | 0.34 ± 7.14          | 0.128                        | 0.515           |
|                                | -                 | 28.61 ± 9.01        | 0.743                        | -0.73 ± 8.12         |                              |                 |
| Platelet, 10 <sup>9</sup> /L   | +                 | 204.93 ± 54.97      | 0.305                        | -12.29 ± 43.04       | -0.112                       | 0.572           |
|                                | -                 | 181.43 ± 33.31      | 0.213                        | -11.00 ± 31.42       |                              |                 |
| NLR                            | +                 | 1.72 ± 0.73         | 0.675                        | 0.06 ± 0.54          | -0.357                       | 0.062           |
|                                | -                 | 2.49 ± 1.36         | 0.300                        | 0.35 ± 1.06          |                              |                 |
| MLR                            | +                 | 0.19 ± 0.06         | 0.595                        | 0.01 ± 0.05          | -0.249                       | 0.202           |
|                                | -                 | 0.26 ± 0.09         | 0.397                        | 0.02 ± 0.07          |                              |                 |
| PLR                            | +                 | 102.45 ± 37.17      | 0.886                        | 0.97 ± 24.67         | -0.046                       | 0.815           |
|                                | -                 | 110.42 ± 51.34      | 0.826                        | -4.56 ± 30.35        |                              |                 |
| SII                            | +                 | 340.83 ± 172.58     | 0.875                        | -7.24 ± 168.28       | -0.283                       | 0.144           |
|                                | -                 | 433.43 ± 186.85     | 0.568                        | 29.94 ± 191.33       |                              |                 |
| SIRI                           | +                 | 0.74 ± 0.51         | 0.778                        | 0.03 ± 0.40          | <b>-0.414</b>                | <b>0.028</b>    |
|                                | -                 | 1.15 ± 0.75         | 0.241                        | 0.23 ± 0.69          |                              |                 |
| PIV                            | +                 | 152.64 ± 131.81     | 0.331                        | 0.81 ± 118.57        | -0.293                       | 0.130           |
|                                | -                 | 199.79 ± 100.93     | 0.492                        | 21.50 ± 113.76       |                              |                 |

All characteristics were presented as mean ± S.D. Statistical significance was denoted by bold values.

<sup>a</sup>ASMI (+) or (-) indicated ASMI increase or decrease.

<sup>b</sup>Comparison between levels at baseline and one-year follow-up.

**Table 3. Univariable and multivariable regression analyses of ASMI change.**

| Baseline variables     | Univariable regression analysis |               |                 |        | Multivariable regression analysis |                 |  |
|------------------------|---------------------------------|---------------|-----------------|--------|-----------------------------------|-----------------|--|
|                        | B                               | 95% CI        | <i>p</i> -value | B      | 95% CI                            | <i>p</i> -value |  |
| BMI, kg/m <sup>2</sup> | -0.436                          | -0.759 -0.113 | 0.010*          | -0.326 | -0.642 -0.009                     | 0.044*          |  |
| CC, cm                 | -0.646                          | -1.127 -0.166 | 0.010*          | -0.385 | -0.845 0.075                      | 0.096           |  |
| NLR                    | -2.474                          | -4.579 -0.368 | 0.023*          | -2.106 | -3.887 -0.325                     | 0.023*          |  |

\**p*-value < 0.05

pyroptosis [22]. NLR, derived from the absolute counts of peripheral neutrophils and lymphocytes, is a systemic inflammatory index. The normal range of NLR is considered to be between 1.00 and 2.00, with values higher than 3.00 or lower than 0.70 deemed pathological [23]. In this study, we found that a higher NLR level in males aged  $\geq 70$ , even within normal range, was associated with a ASMI decrease in the following year. In this study, the baseline NLR was  $2.14 \pm 0.56$  in ASMI-decreased participants and  $1.66 \pm 0.62$  in ASMI-increased participants. While WBC counts were similar between ASMI-decreased and ASMI-increased participants, the higher NLR level in ASMI-decreased participants resulted from a relatively higher neutrophil proportion and a lower lymphocyte proportion compared to those in ASMI-increased participants. Previously, Nakanishi and colleagues demonstrated that neutrophils lead to muscle atrophy in animal models [17], and Slaets and colleagues reported that T lymphocytes are crucial for muscle regeneration [24].

Yoon and colleagues investigated the relationship between skeletal muscle mass and inflammatory markers in Korean adults, finding that males with low muscle mass exhibited higher NLR compared to those with normal muscle mass in a cross-sectional study [25]. In our study, we highlighted a correlation between higher NLR and ASMI reduction after one year in Taiwanese males aged  $\geq 70$ . The prognostic potential of

NLR underscores its importance for early intervention to prevent further muscle loss among the elderly.

Based on ASMI, handgrip strength, and 4-metre gait speed measurements, we identified 8 (57.14%) sarcopenic participants among ASMI-increased participants and 4 (28.57%) sarcopenic participants among ASMI-decreased participants. However, no significant relationship between sarcopenia and ASMI reduction was observed. It is documented that exercise interventions, particularly resistance training and electromyostimulation, are beneficial for improving muscle mass and strength in sarcopenic patients [26, 27]. Previous studies have reported that high NLR is associated with sarcopenia [12, 13, 16]. NLR has been developed as a prognostic marker of sarcopenia, with the cut-off value varying depending on the study population. For example, Hu and colleagues reported that hospitalized renal cell carcinoma patients with  $NLR > 2.88$  have a higher risk of sarcopenia [13], while Borges and colleagues found that hospitalized cancer patients with  $NLR \geq 6.5$  have a higher risk of sarcopenia [12]. In our study, which enrolled elderly patients without severe illness or dementia, we found that males aged  $\geq 70$  with  $NLR \geq 1.94$  had a higher risk of ASMI reduction. These findings suggest that sarcopenic patients should not give up on strengthening their muscles, as sarcopenia does not necessarily lead to further muscle mass decline. Additionally, the NLR of elderly men should be regularly evaluated, and changes

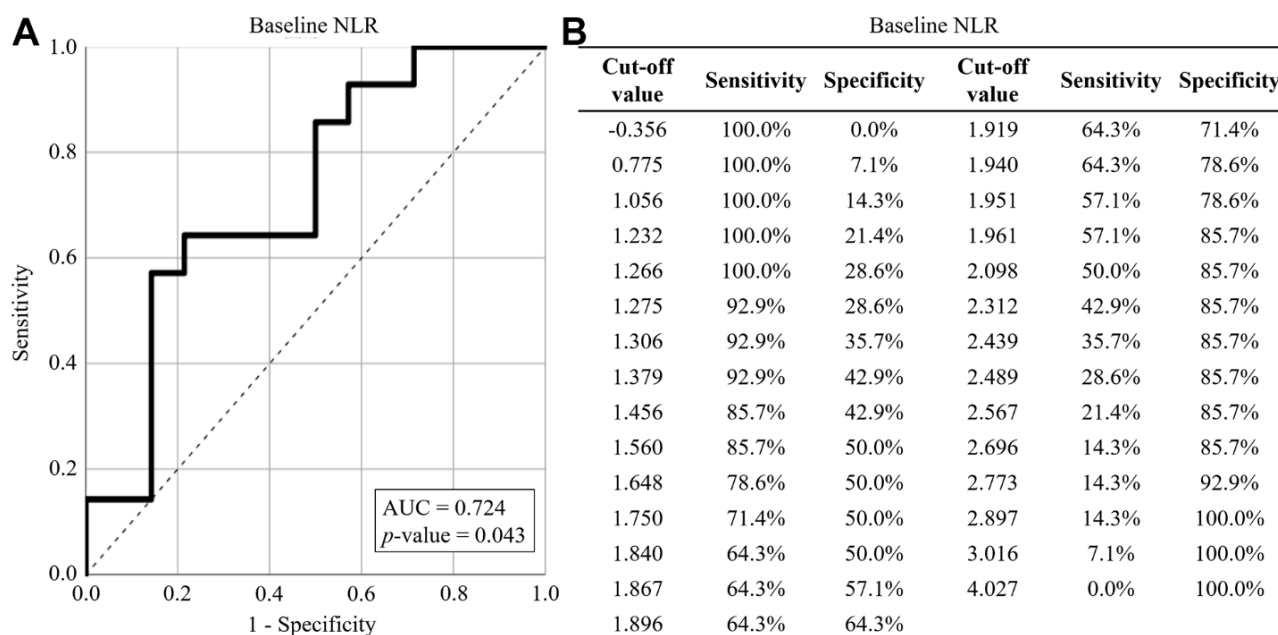

**Figure 2. ROC curve analysis for ASMI reduction.** (A) The performance of baseline NLR in predicting ASMI reduction. (B) The sensitivity and specificity of baseline NLR in predicting ASMI reduction. The baseline NLR was represented by solid lines, while reference lines were depicted by dashed lines. AUC: area under the curve.

in NLR should be closely monitored, even if they have not reached the threshold of high sarcopenia risk.

We observed that the baseline BMI and CC were  $25.18 \pm 2.18$  and  $34.92 \pm 2.12$  cm, respectively, in ASMI-increased participants, whereas these values were  $28.48 \pm 4.73$  and  $37.15 \pm 3.05$  cm in ASMI-decreased participants. Low BMI has been associated with a higher risk of probable sarcopenia [28], and AWGS identifies males with  $CC < 34$  cm as being at high risk of sarcopenia [9]. However, the relationships between BMI and CC and muscle mass reduction have not been fully elucidated. The inverse relationships we observed between baseline BMI and CC and ASMI change suggest that males with higher BMI and CC tend to experience a decrease in ASMI after one year. An apparent decline in BMI, but not in CC, was then observed along with ASMI reduction. On one hand, this may be because males with higher ASMI require more or more intense exercise to increase or maintain their ASMI. On the other hand, the mean BMI in this study were relatively higher, and a large proportion of participants met the criteria for obesity. The negative correlation between baseline BMI and subsequent ASMI decline suggests that obesity may play a role in the progression of sarcopenia, commonly referred to as sarcopenic obesity. Therefore, personalized exercise recommendations for the elderly, considering their BMI and CC, are important.

There are limitations to this study. First, it remains unclear whether the higher NLR is a cause or a consequence of ASMI decrease. Skeletal muscle has been reported to secrete myokines that attenuate inflammation [29], but it is unknown whether the proportions of neutrophils and lymphocytes in WBC are directly or indirectly affected by skeletal muscle. Continuous monitoring of NLR and ASMI changes in the study participants over several years is necessary to clarify their relationship. Second, our limited sample size may have introduced bias into the results. Further investigations with a larger cohort are needed to validate our findings.

## CONCLUSION

The communication of skeletal muscles and other organs has been increasingly recognized over the past few decades. Skeletal muscle is not only essential for body mobility but also plays a crucial role in immunity [24], glucose metabolism [30], bone metabolism [31], cognitive function [32], and tumor suppression [33]. These issues are major medical concerns for the elderly, making the monitoring of skeletal muscle mass important for this population. A reliable prognostic marker of skeletal muscle mass reduction

could assist geriatricians in early medical intervention. In this study, we identified NLR as a potential prognostic marker for ASMI decline, with current data suggesting that a higher NLR ( $>1.94$ ) might predict muscle mass reduction over the following year. However, due to the limited sample size of this study, the clinical utility of NLR requires further investigation in larger cohorts.

## MATERIALS AND METHODS

### Study participants

Given the strikingly elevated prevalence of sarcopenia in males aged  $\geq 70$  as reported [8], males aged  $\geq 70$  without severe diseases or dementia were enrolled in this study. They underwent muscle mass measurements, physical measurements, and hematological tests. Twenty-one participants were recruited from the Department of Geriatrics and General Internal Medicine, Linkou Medical Center, Chang Gung Memorial Hospital, and 10 participants were recruited through medical examinations in the community. The participants were followed for one year, and those unable to complete the muscle mass measurements, physical measurements, or hematological tests were excluded from the study. No participant experienced a severe infection during the study.

### Sarcopenia definition

According to the consensus of the Asian Working Group for Sarcopenia (AWGS) in 2019 [9], participants in this study were classified as sarcopenic if their appendicular skeletal muscle mass index (ASMI), which was calculated as appendicular skeletal muscle mass divided by the square of height, was lower than  $7 \text{ kg/m}^2$ , accompanied by handgrip strength lower than  $28 \text{ kg}$  or a 4-metre gait speed slower than  $1 \text{ m/s}$ .

### Data collection

Clinical data, including age, height, body mass index (BMI), and CC, were collected when participants visited the geriatric outpatient clinic or underwent medical examinations. The ASMI of participants recruited from Chang Gung Memorial Hospital was measured by DXA, while the ASMI of participants recruited from medical examinations in the community was measured by BIA. Peripheral blood samples were collected by trained professionals to analyze white blood cell (WBC) and platelet counts. Inflammatory indexes were calculated as follows:  $NLR = \text{neutrophil count } (10^9/L) / \text{lymphocyte count } (10^9/L)$ ;  $\text{monocyte-to-lymphocyte ratio (MLR)} = \text{monocyte count } (10^9/L) / \text{lymphocyte count } (10^9/L)$ ;  $\text{PLR} = \text{platelet count}$

$(10^9/L)/\text{lymphocyte count } (10^9/L)$ ; SII = neutrophil count  $(10^9/L) \times \text{platelet count } (10^9/L)/\text{lymphocyte count } (10^9/L)$ ; SIRI = neutrophil count  $(10^9/L) \times \text{monocyte count } (10^9/L)/\text{lymphocyte count } (10^9/L)$ ; pan-immune-inflammation value (PIV) = neutrophil count  $(10^9/L) \times \text{monocyte count } (10^9/L) \times \text{platelet count } (10^9/L)/\text{lymphocyte count } (10^9/L)$ .

### Statistical analysis

The prevalence of sarcopenia among study participants was analyzed using the Chi-squared test to evaluate the relationship between sarcopenia and ASMI change. Quantitative variables were expressed as mean  $\pm$  standard deviation and analyzed using the Kolmogorov-Smirnov test to assess normal distribution. Variables exhibiting a normal distribution were analyzed using the Student's t-test or paired-sample t-test where applicable, while non-normally distributed variables were analyzed using the Mann-Whitney U test or Wilcoxon sign-rank test where applicable. The relationships between variables and ASMI change were analyzed using correlation coefficients and linear regression analyses. The ability of the variables to predict ASMI reduction was assessed using receiver operating characteristic (ROC) curve analysis. All analyses were performed using IBM SPSS Statistics 26.0, with statistical significance set at  $p\text{-value} < 0.05$ .

### Abbreviations

ASMI: appendicular skeletal muscle mass index; AUC: area under the curve; AWGS: Asian Working Group for Sarcopenia; BMI: body mass index; CC: calf circumference; DXA: dual-energy x-ray absorptiometry; MLR: monocyte-to-lymphocyte ratio; NLR: neutrophil-to-lymphocyte ratio; PIV: pan-immune-inflammation value; PLR: platelet-to-lymphocyte ratio; ROC: receiver operating characteristic; SARC-F: Strength, Assistance with walking, Rise from a chair, Climb stairs, and Falls; SII: systemic immune-inflammation index; SIRI: systemic inflammation response index; TNF- $\alpha$ : tumor necrosis factor- $\alpha$ ; WBC: white blood cell.

### AUTHOR CONTRIBUTIONS

Supervision: CYL. Funding acquisition: YJC and JTF. Investigations: YJC, CHL, KCL and JTF. Statistical analyses: TST and YCC. Writing original draft: CLY and TST. Review and editing: All co-authors.

### ACKNOWLEDGMENTS

We acknowledge the support provided by Linkou Medical Center, Chang Gung Memorial Hospital.

### CONFLICTS OF INTEREST

The authors declare that they have no conflicts of interest.

### ETHICAL STATEMENT AND CONSENT

This study was approved by the Institutional Review Board of Linkou Medical Center, Chang Gung Memorial Hospital (approval numbers: 202101042B0, 202200540A3, 202100554B0, and 202300637B0). Written informed consent was obtained from the participants for their anonymized information to be published in this article.

### FUNDING

This work was supported by Linkou Medical Center, Chang Gung Memorial Hospital (grant numbers: CMRPG3L1251, CMRPG3L1252, CORPG3N0151, XMRPG3L102 and XMRPG3N0651).

### REFERENCES

1. Veronese N, Smith L, Barbagallo M, Yang L, Zou L, Haro JM, Koyanagi A. Sarcopenia and fall-related injury among older adults in five low- and middle-income countries. *Exp Gerontol*. 2021; 147:111262. <https://doi.org/10.1016/j.exger.2021.111262> PMID:33516908
2. Veronese N, Koyanagi A, Cereda E, Maggi S, Barbagallo M, Dominguez LJ, Smith L. Sarcopenia reduces quality of life in the long-term: longitudinal analyses from the English longitudinal study of ageing. *Eur Geriatr Med*. 2022; 13:633–9. <https://doi.org/10.1007/s41999-022-00627-3> PMID:35212911
3. Wang Y, Tan S, Yan Q, Gao Y. Sarcopenia and COVID-19 Outcomes. *Clin Interv Aging*. 2023; 18:359–73. <https://doi.org/10.2147/CIA.S398386> PMID:36923269
4. Xue Q, Wu J, Ren Y, Hu J, Yang K, Cao J. Sarcopenia predicts adverse outcomes in an elderly population with coronary artery disease: a systematic review and meta-analysis. *BMC Geriatr*. 2021; 21:493. <https://doi.org/10.1186/s12877-021-02438-w> PMID:34521369
5. Katsui K, Ogata T, Sugiyama S, Yoshio K, Kuroda M, Hiraki T, Kiura K, Maeda Y, Toyooka S, Kanazawa S. Sarcopenia is associated with poor prognosis after chemoradiotherapy in patients with stage III non-small-cell lung cancer: a retrospective analysis. *Sci Rep*. 2021; 11:11882. <https://doi.org/10.1038/s41598-021-91449-z> PMID:34088965

6. Katsui K, Ogata T, Watanabe K, Yoshio K, Kuroda M, Yamane M, Hiraki T, Kiura K, Toyooka S, Kanazawa S. Sarcopenia is related to poor prognosis in patients after trimodality therapy for locally advanced non-small cell lung cancer. *Int J Clin Oncol*. 2021; 26:1450–60. <https://doi.org/10.1007/s10147-021-01927-7> PMID:33880655
7. Hu X, Liao DW, Yang ZQ, Yang WX, Xiong SC, Li X. Sarcopenia predicts prognosis of patients with renal cell carcinoma: A systematic review and meta-analysis. *Int Braz J Urol*. 2020; 46:705–15. <https://doi.org/10.1590/S1677-5538.IBJU.2019.0636> PMID:32213202
8. Cao M, Lian J, Lin X, Liu J, Chen C, Xu S, Ma S, Wang F, Zhang N, Qi X, Xu G, Peng N. Prevalence of sarcopenia under different diagnostic criteria and the changes in muscle mass, muscle strength, and physical function with age in Chinese old adults. *BMC Geriatr*. 2022; 22:889. <https://doi.org/10.1186/s12877-022-03601-7> PMID:36418979
9. Chen LK, Woo J, Assantachai P, Auyeung TW, Chou MY, Iijima K, Jang HC, Kang L, Kim M, Kim S, Kojima T, Kuzuya M, Lee JS, et al. Asian Working Group for Sarcopenia: 2019 Consensus Update on Sarcopenia Diagnosis and Treatment. *J Am Med Dir Assoc*. 2020; 21:300–07.e2. <https://doi.org/10.1016/j.jamda.2019.12.012> PMID:32033882
10. Kaur N, Gupta P, Dutt V, Sharma O, Gupta S, Dua A, Injeti E, Mittal A. Cinnamaldehyde attenuates TNF- $\alpha$  induced skeletal muscle loss in C2C12 myotubes via regulation of protein synthesis, proteolysis, oxidative stress and inflammation. *Arch Biochem Biophys*. 2024; 753:109922. <https://doi.org/10.1016/j.abb.2024.109922> PMID:38341069
11. Jimenez-Gutierrez GE, Martínez-Gómez LE, Martínez-Armenta C, Pineda C, Martínez-Nava GA, Lopez-Reyes A. Molecular Mechanisms of Inflammation in Sarcopenia: Diagnosis and Therapeutic Update. *Cells*. 2022; 11:2359. <https://doi.org/10.3390/cells11152359> PMID:35954203
12. Borges TC, Gomes TL, Pichard C, Laviano A, Pimentel GD. High neutrophil to lymphocytes ratio is associated with sarcopenia risk in hospitalized cancer patients. *Clin Nutr*. 2021; 40:202–6. <https://doi.org/10.1016/j.clnu.2020.05.005> PMID:32446788
13. Hu Q, Mao W, Wu T, Xu Z, Yu J, Wang C, Chen S, Chen S, Xu B, Xu Y, Chen M. High Neutrophil-to-Lymphocyte Ratio and Platelet-to-Lymphocyte Ratio Are Associated With Sarcopenia Risk in Hospitalized Renal Cell Carcinoma Patients. *Front Oncol*. 2021; 11:736640. <https://doi.org/10.3389/fonc.2021.736640> PMID:34760698
14. Aziz MH, van Dongen JC, Saida L, Suker M, van Vugt JL, van Putten Y, Sideras K, Groen JV, Mieog JS, Lucassen CJ, Droop A, Mauff K, Shahbazi Feshtali S, et al. High Systemic Immune Inflammation Index Is Associated With Low Skeletal Muscle Quantity in Resectable Pancreatic Ductal Adenocarcinoma. *Front Oncol*. 2022; 12:827755. <https://doi.org/10.3389/fonc.2022.827755> PMID:35296013
15. Shi L, Zhang L, Zhang D, Chen Z. Association between systemic immune-inflammation index and low muscle mass in US adults: a cross-sectional study. *BMC Public Health*. 2023; 23:1416. <https://doi.org/10.1186/s12889-023-16338-8> PMID:37488531
16. Nie H, Liu Y, Zeng X, Chen M. Neutrophil-to-lymphocyte ratio is associated with sarcopenia risk in overweight maintenance hemodialysis patients. *Sci Rep*. 2024; 14:3669. <https://doi.org/10.1038/s41598-024-54056-2> PMID:38351264
17. Nakanishi N, Ono Y, Miyazaki Y, Moriyama N, Fujioka K, Yamashita K, Inoue S, Kotani J. Sepsis causes neutrophil infiltration in muscle leading to muscle atrophy and weakness in mice. *Front Immunol*. 2022; 13:950646. <https://doi.org/10.3389/fimmu.2022.950646> PMID:36389802
18. Graca FA, Stephan A, Minden-Birkenmaier BA, Shirinifard A, Wang YD, Demontis F, Labelle M. Platelet-derived chemokines promote skeletal muscle regeneration by guiding neutrophil recruitment to injured muscles. *Nat Commun*. 2023; 14:2900. <https://doi.org/10.1038/s41467-023-38624-0> PMID:37217480
19. Wu J, Ren B, Wang D, Lin H. Regulatory T cells in skeletal muscle repair and regeneration: recent insights. *Cell Death Dis*. 2022; 13:680. <https://doi.org/10.1038/s41419-022-05142-8> PMID:35931697
20. Riviat N, Indra B. Relationship between muscle mass and muscle strength with physical performance in older adults: A systematic review. *SAGE Open Med*. 2023; 11:20503121231214650. <https://doi.org/10.1177/20503121231214650> PMID:38033420
21. Li X, Li C, Zhang W, Wang Y, Qian P, Huang H. Inflammation and aging: signaling pathways and intervention therapies. *Signal Transduct Target Ther*. 2023; 8:239.



- <https://doi.org/10.1038/s41392-023-01502-8>  
PMID:[37291105](https://pubmed.ncbi.nlm.nih.gov/37291105/)
22. Wu J, Lin S, Chen W, Lian G, Wu W, Chen A, Sagor MI, Luo L, Wang H, Xie L. TNF- $\alpha$  contributes to sarcopenia through caspase-8/caspase-3/GSDME-mediated pyroptosis. *Cell Death Discov.* 2023; 9:76.  
<https://doi.org/10.1038/s41420-023-01365-6>  
PMID:[36823174](https://pubmed.ncbi.nlm.nih.gov/36823174/)
23. Zahorec R. Neutrophil-to-lymphocyte ratio, past, present and future perspectives. *Bratisl Lek Listy.* 2021; 122:474–88.  
[https://doi.org/10.4149/BLL\\_2021\\_078](https://doi.org/10.4149/BLL_2021_078)  
PMID:[34161115](https://pubmed.ncbi.nlm.nih.gov/34161115/)
24. Slaets H, Fonteyn L, Eijnde BO, Hellings N. Train your T cells: How skeletal muscles and T cells keep each other fit during aging. *Brain Behav Immun.* 2023; 110:237–44.  
<https://doi.org/10.1016/j.bbi.2023.03.006>  
PMID:[36893922](https://pubmed.ncbi.nlm.nih.gov/36893922/)
25. Yoon SK, Kim HN, Song SW. Associations of skeletal muscle mass with atherosclerosis and inflammatory markers in Korean adults. *Arch Gerontol Geriatr.* 2020; 90:104163.  
<https://doi.org/10.1016/j.archger.2020.104163>  
PMID:[32629371](https://pubmed.ncbi.nlm.nih.gov/32629371/)
26. Janani S, Sedhunivas R. Effectiveness of exercise interventions on muscle mass among older adults with sarcopenic obesity: A scoping review. *Aging Med (Milton).* 2024; 7:115–20.  
<https://doi.org/10.1002/agm2.12288> PMID:[38571676](https://pubmed.ncbi.nlm.nih.gov/38571676/)
27. Teschler M, Heimer M, Schmitz B, Kemmler W, Mooren FC. Four weeks of electromyostimulation improves muscle function and strength in sarcopenic patients: a three-arm parallel randomized trial. *J Cachexia Sarcopenia Muscle.* 2021; 12:843–54.  
<https://doi.org/10.1002/jcsm.12717> PMID:[34105256](https://pubmed.ncbi.nlm.nih.gov/34105256/)
28. Curtis M, Swan L, Fox R, Warters A, O’Sullivan M. Associations between Body Mass Index and Probable Sarcopenia in Community-Dwelling Older Adults. *Nutrients.* 2023; 15:1505.  
<https://doi.org/10.3390/nu15061505> PMID:[36986233](https://pubmed.ncbi.nlm.nih.gov/36986233/)
29. Choi SW, Oh H, Park SY, Cho W, Abd El-Aty AM, Hacimuftuoglu A, Jeong JH, Jung TW. Myokine musclin alleviates lipid accumulation in 3T3-L1 adipocytes through PKA/p38-mediated upregulation of lipolysis and suppression of lipogenesis. *Biochem Biophys Res Commun.* 2023; 642:113–7.  
<https://doi.org/10.1016/j.bbrc.2022.12.056>  
PMID:[36566562](https://pubmed.ncbi.nlm.nih.gov/36566562/)
30. Balakrishnan R, Thurmond DC. Mechanisms by Which Skeletal Muscle Myokines Ameliorate Insulin Resistance. *Int J Mol Sci.* 2022; 23:4636.  
<https://doi.org/10.3390/ijms23094636>  
PMID:[35563026](https://pubmed.ncbi.nlm.nih.gov/35563026/)
31. Shao M, Wang Q, Lv Q, Zhang Y, Gao G, Lu S. Advances in the research on myokine-driven regulation of bone metabolism. *Heliyon.* 2023; 10:e22547.  
<https://doi.org/10.1016/j.heliyon.2023.e22547>  
PMID:[38226270](https://pubmed.ncbi.nlm.nih.gov/38226270/)
32. Scisciola L, Fontanella RA, Su, Cataldo V, Paolisso G, Barbieri M. Sarcopenia and Cognitive Function: Role of Myokines in Muscle Brain Cross-Talk. *Life (Basel).* 2021; 11:173.  
<https://doi.org/10.3390/life11020173> PMID:[33672427](https://pubmed.ncbi.nlm.nih.gov/33672427/)
33. Park SY, Hwang BO, Song NY. The role of myokines in cancer: crosstalk between skeletal muscle and tumor. *BMB Rep.* 2023; 56:365–73.  
<https://doi.org/10.5483/BMBRep.2023-0064>  
PMID:[37291054](https://pubmed.ncbi.nlm.nih.gov/37291054/)
